# Supplementary material for: Activation of pentafluoropropane isomers at a nanoscopic aluminum chlorofluoride: hydrodefluorination versus dehydrofluorination
Source: publisher site journal article supplement (doi:10.3762/bjoc.16.213), 2020-10-23
Supplement: Additional file 1 [file 1860-5397-16-213-S1.pdf]

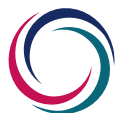

## Supporting Information

for

### **Activation of pentafluoropropane isomers at a nanoscopic aluminum chlorofluoride: hydrodefluorination versus dehydrofluorination**

Maëva-Charlotte Kervarec, Thomas Braun, Mike Ahrens and Erhard Kemnitz

*Beilstein J. Org. Chem.* **2020**, *16*, 2623–2635. doi:10.3762/bjoc.16.213

### **Analytical data and copies of spectra**

## 1- General procedure

In a JYoung NMR tube, 25 mg of ACF was suspended in either  $\text{C}_6\text{D}_6$  or  $\text{C}_6\text{D}_{12}$  (0.4 mL) as solvent. In the reactions involving a silane, either 60  $\mu\text{L}$  of silane were added to the tubes containing a solvent (0.4 mL) or the reactions were performed in neat silane (0.5 mL). The gases were then condensed using a small glass bulb filled with 0.5 atm of the corresponding gas (0.1 mmol). The reactions were monitored by  $^1\text{H}$  and  $^{19}\text{F}$  NMR spectroscopy over 7 days and the tubes were kept at 70  $^\circ\text{C}$ .  $\text{PhCF}_3$  or  $\text{C}_6\text{F}_6$  was used as an external standard in a closed capillary in order to calculate the conversion based on the consumed substrate by the integration of  $^{19}\text{F}$  NMR spectra.

## 2- Activation of 1,1,1,2,3-pentafluoropropane **10a**

### a. Without the presence of silane

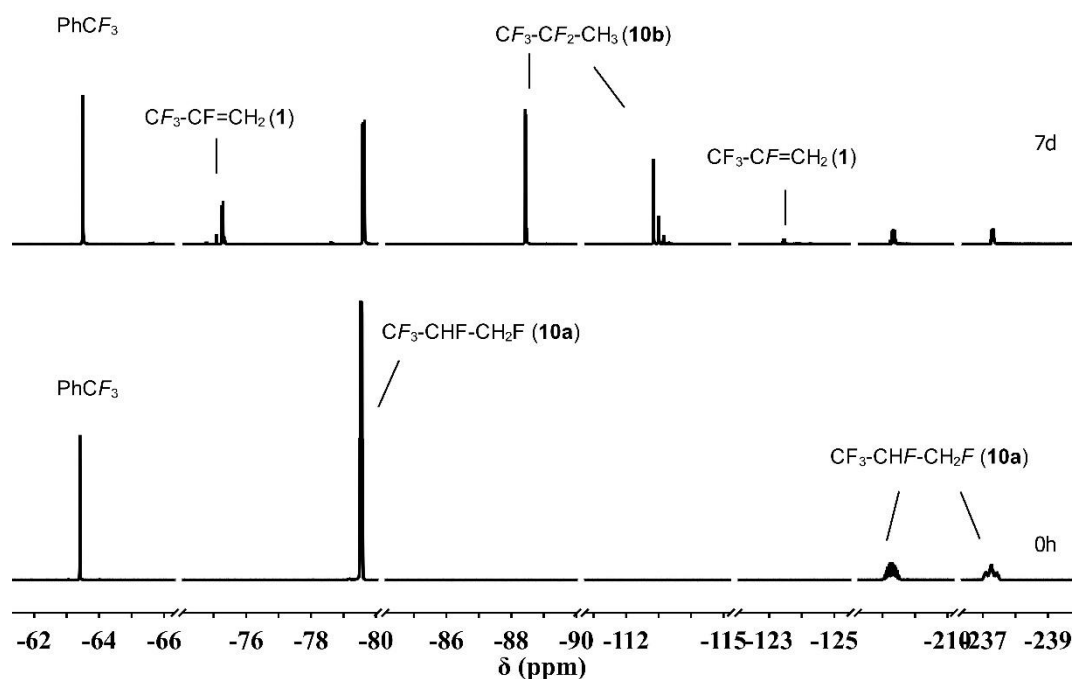

**Figure 1:**  $^{19}\text{F}$  NMR spectra for the activation of **10a** in the presence of ACF as the catalyst in  $\text{C}_6\text{D}_{12}$ .

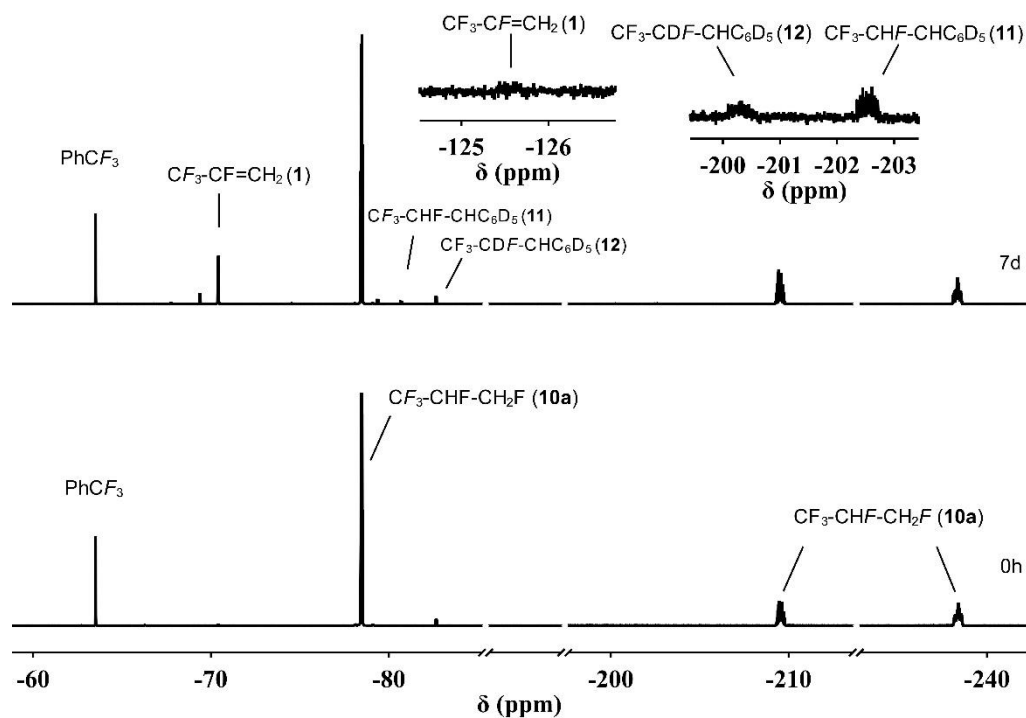

**Figure 2:**  $^{19}\text{F}$  NMR spectra for the activation of **10a** in the presence of ACF as the catalyst in  $\text{C}_6\text{D}_6$ .

b. In the presence of silane

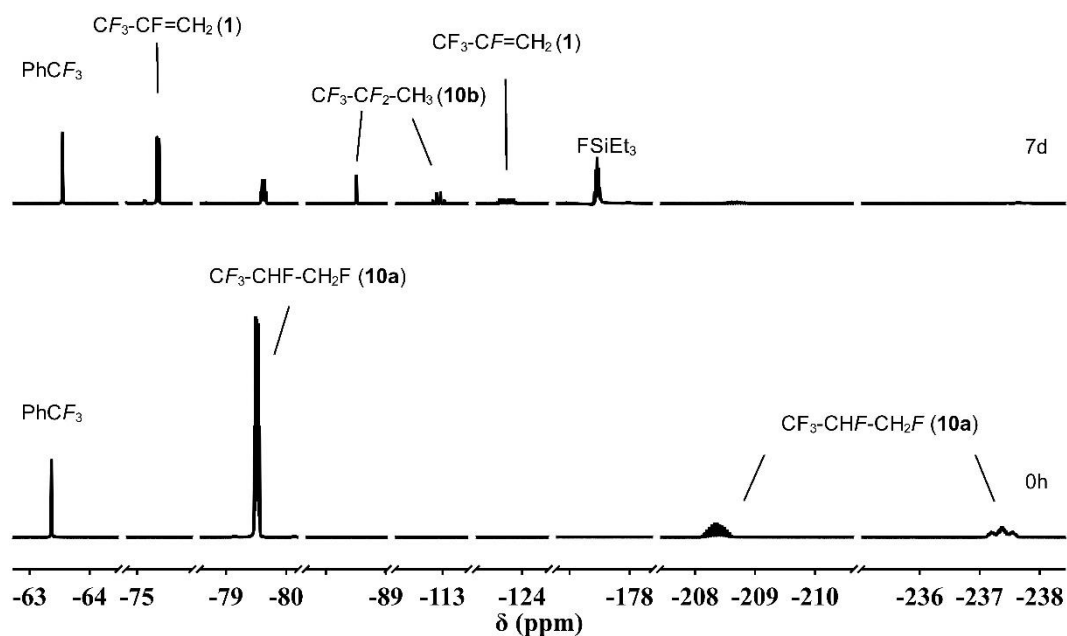

**Figure 3:**  $^{19}\text{F}$  NMR spectra for the activation of **10a** in the presence of ACF as the catalyst and  $\text{HSiEt}_3$  as the hydrogen source in  $\text{C}_6\text{D}_{12}$ .

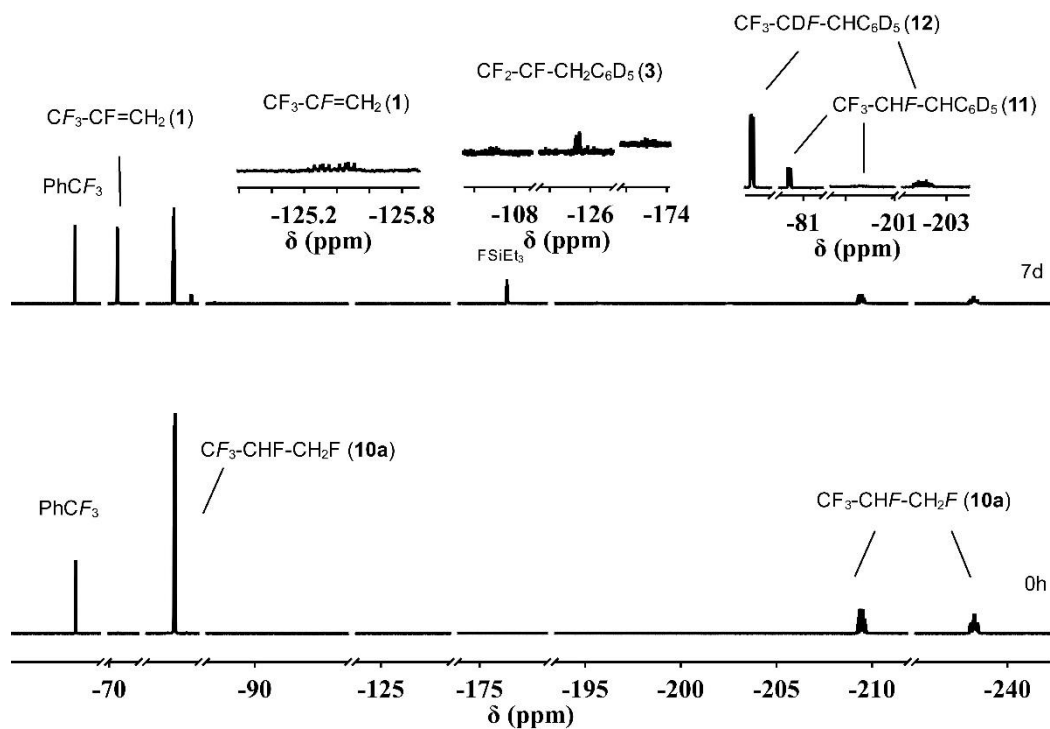

**Figure 4:**  $^{19}\text{F}$  NMR spectra for the activation of **10a** in the presence of ACF as the catalyst and  $\text{HSiEt}_3$  as the hydrogen source in  $\text{C}_6\text{D}_6$ .

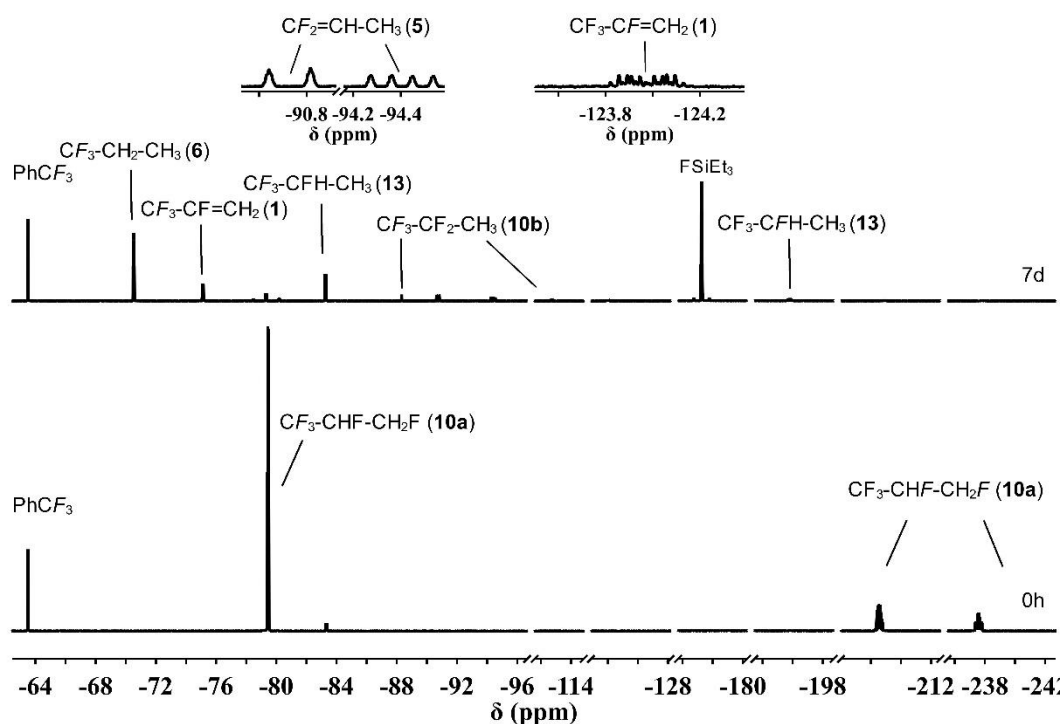

**Figure 5:**  $^{19}\text{F}$  NMR spectra for the activation of **10a** in the presence of ACF as the catalyst and  $\text{HSiEt}_3$  as the hydrogen source (neat).

### 3- Activation of 1,1,1,3,3-pentafluoropropane **10c**

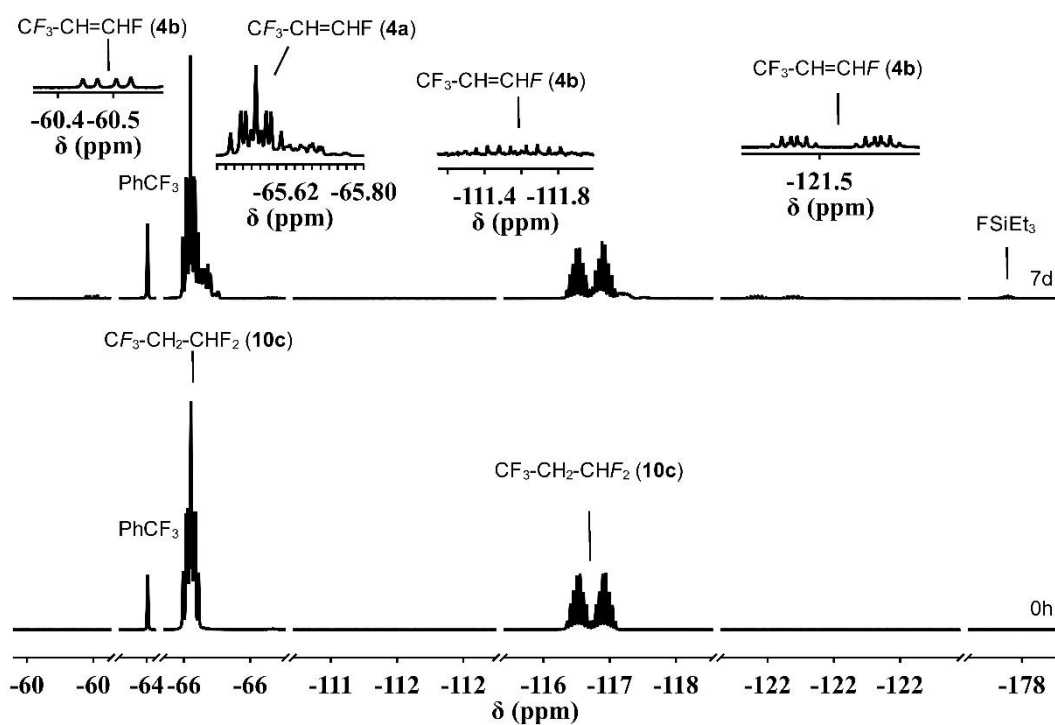

**Figure 6:**  $^{19}\text{F}$  NMR spectra for the activation of **10c** in the presence of ACF as the catalyst and 0.5 equivalent of  $\text{HSiEt}_3$  as the hydrogen source in  $\text{C}_6\text{D}_{12}$ .

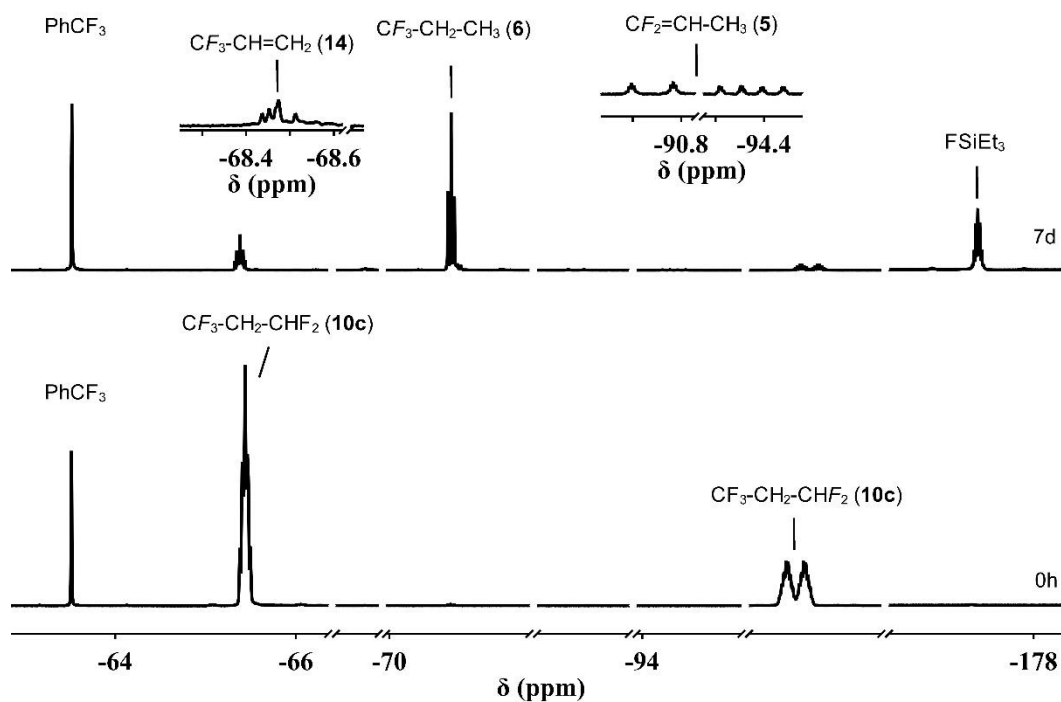

**Figure 7:**  $^{19}\text{F}$  NMR spectra for the activation of **10c** in the presence of ACF as the catalyst and  $\text{HSiEt}_3$  as the hydrogen source in  $\text{C}_6\text{D}_{12}$ .

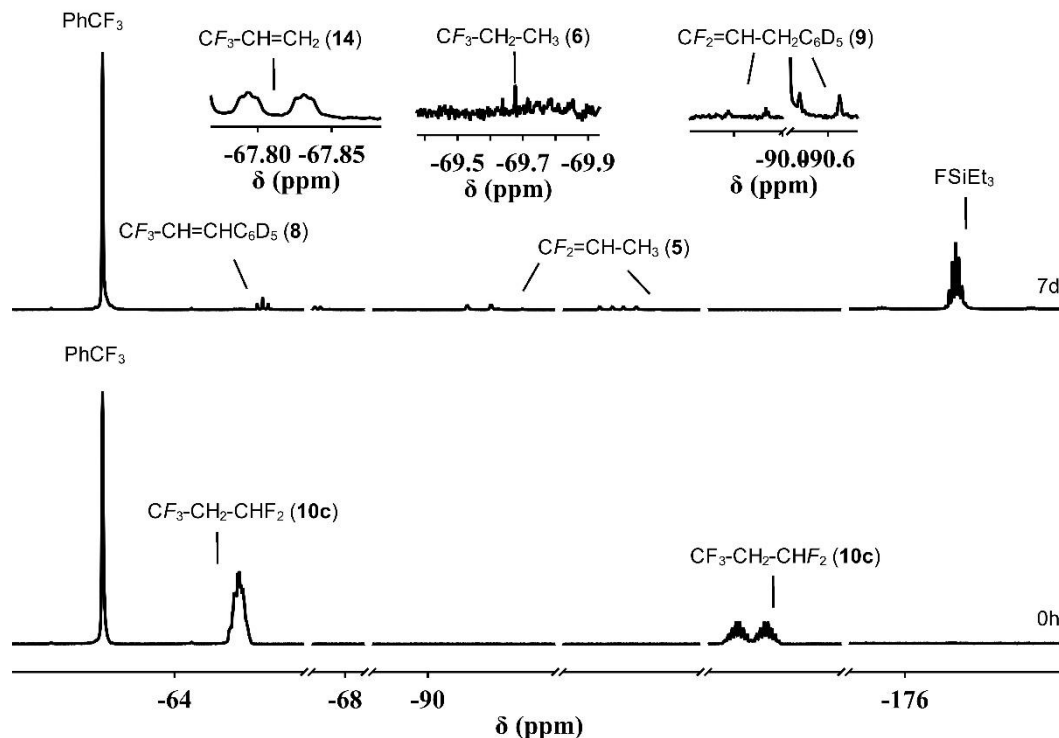

**Figure 8:**  $^{19}\text{F}$  NMR spectra for the activation of **10c** in the presence of ACF as the catalyst and  $\text{HSiEt}_3$  as the hydrogen source in  $\text{C}_6\text{D}_6$ .

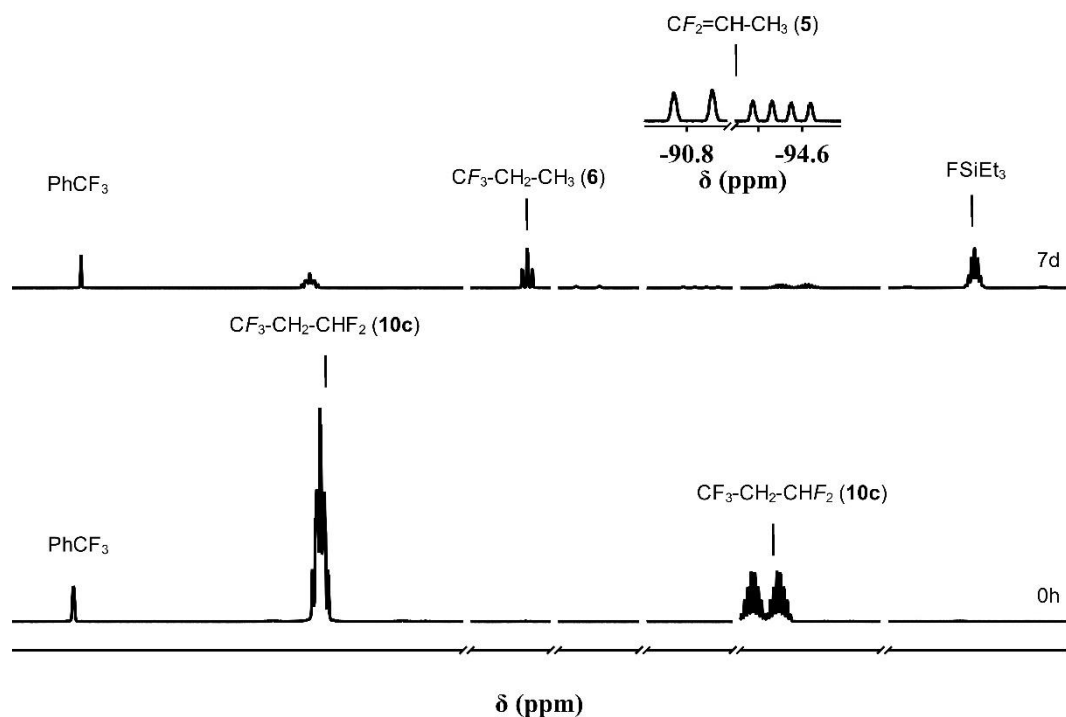

**Figure 9:**  $^{19}\text{F}$  NMR spectra for the activation of **10c** in the presence of ACF as the catalyst and  $\text{HSiEt}_3$  as the hydrogen source (neat).

#### 4- Activation of 1,1,1,2,2-pentafluoropropane **10b**

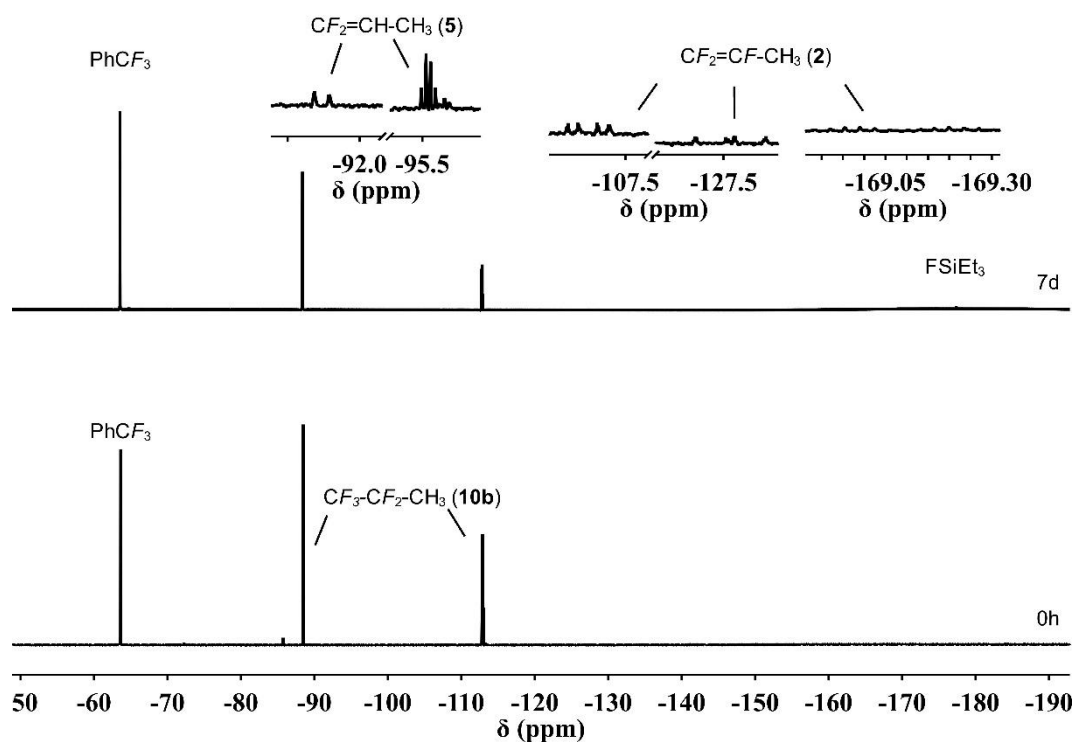

**Figure 10:**  $^{19}\text{F}$  NMR spectra for the activation of **10b** in the presence of ACF as the catalyst and  $\text{HSiEt}_3$  as the hydrogen source in  $\text{C}_6\text{D}_{12}$ .

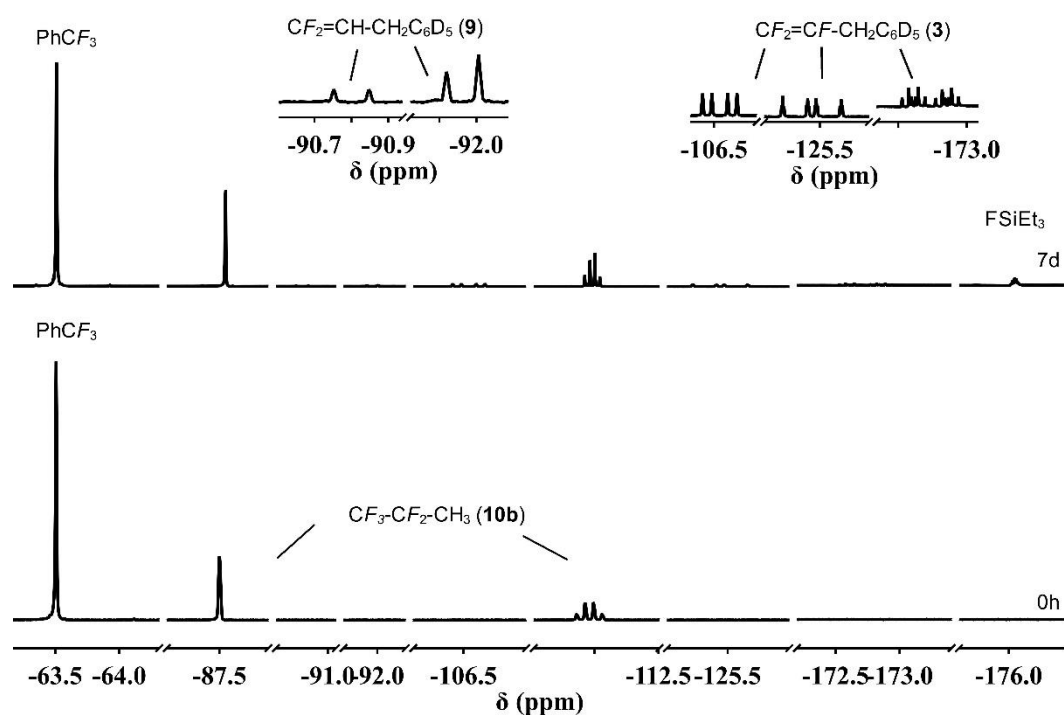

**Figure 11:**  $^{19}\text{F}$  NMR spectra for the activation of **10b** in the presence of ACF as the catalyst and  $\text{HSiEt}_3$  as the hydrogen source in  $\text{C}_6\text{D}_6$ .

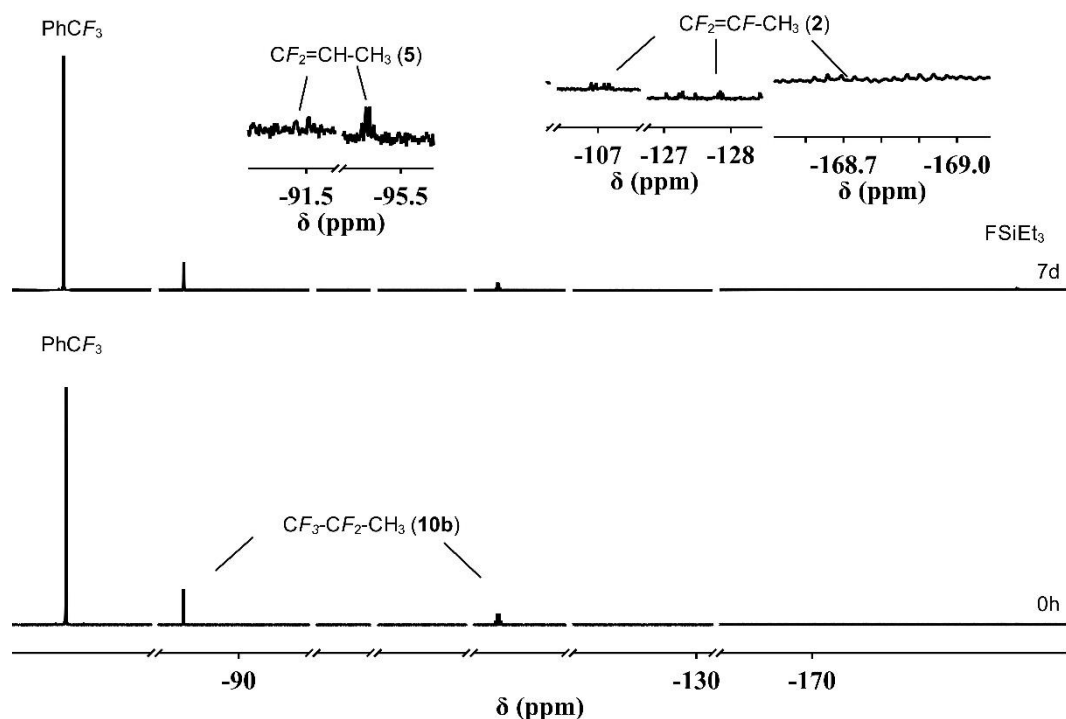

**Figure 12:**  $^{19}\text{F}$  NMR spectra for the activation of **10b** in the presence of ACF as the catalyst and  $\text{HSiEt}_3$  as the hydrogen source (neat).



## 5- Independent reactions

### c. 1,1,1,2-tetrafluoropropane **13**

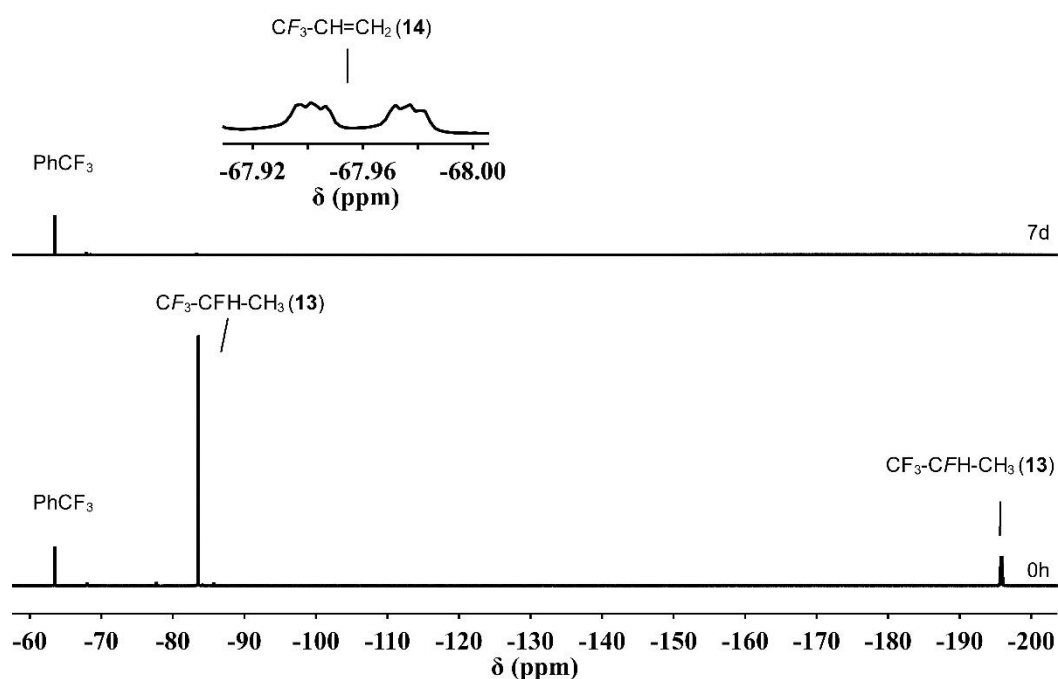

**Figure 13:**  $^{19}\text{F}$  NMR spectra for the activation of **13** in the presence of ACF as the catalyst in  $\text{C}_6\text{D}_{12}$ .

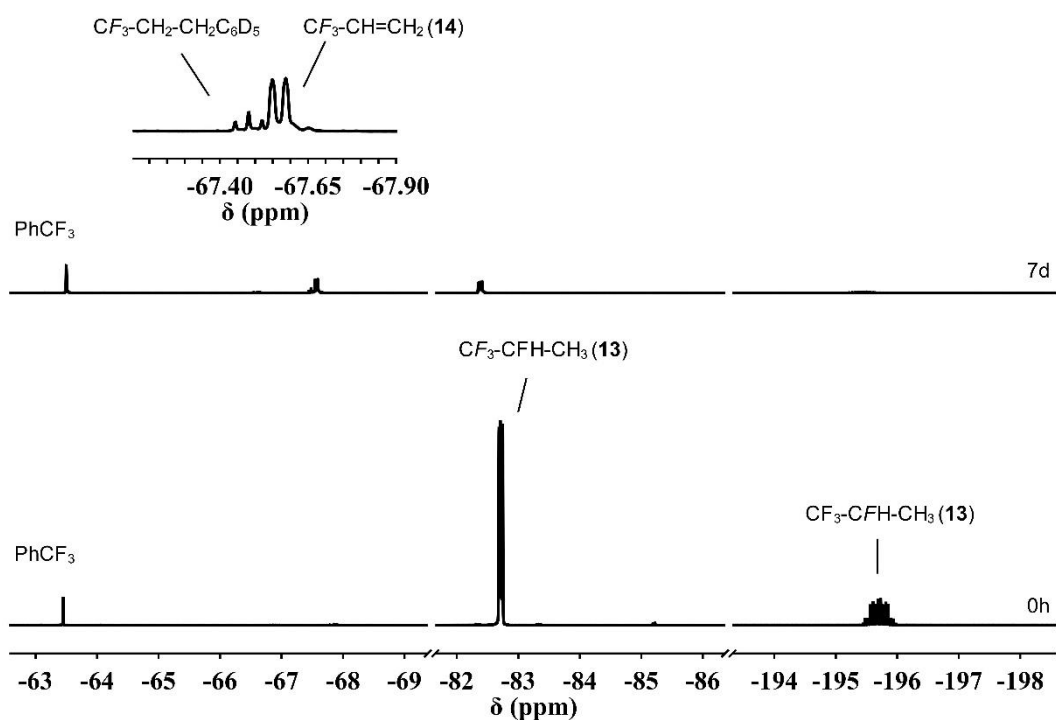

**Figure 14:**  $^{19}\text{F}$  NMR spectra for the activation of **13** in the presence of ACF as the catalyst in  $\text{C}_6\text{D}_6$ .

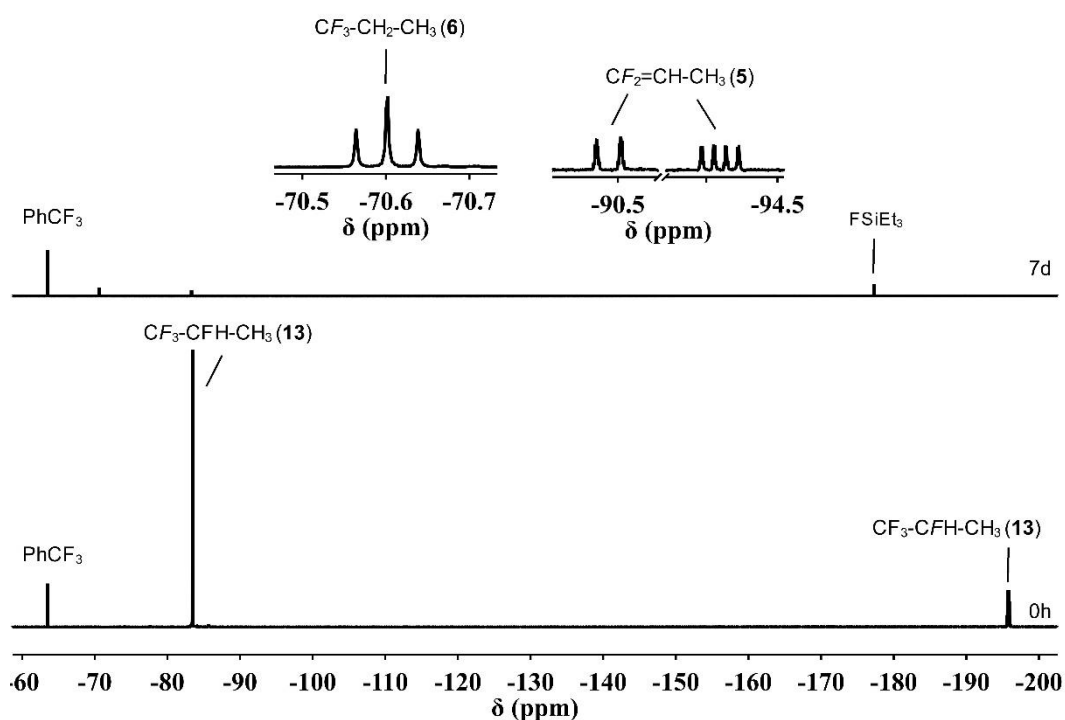

**Figure 15:**  $^{19}\text{F}$  NMR spectra for the activation of **13** in the presence of ACF as the catalyst and  $\text{HSiEt}_3$  as the hydrogen source in  $\text{C}_6\text{D}_{12}$ .

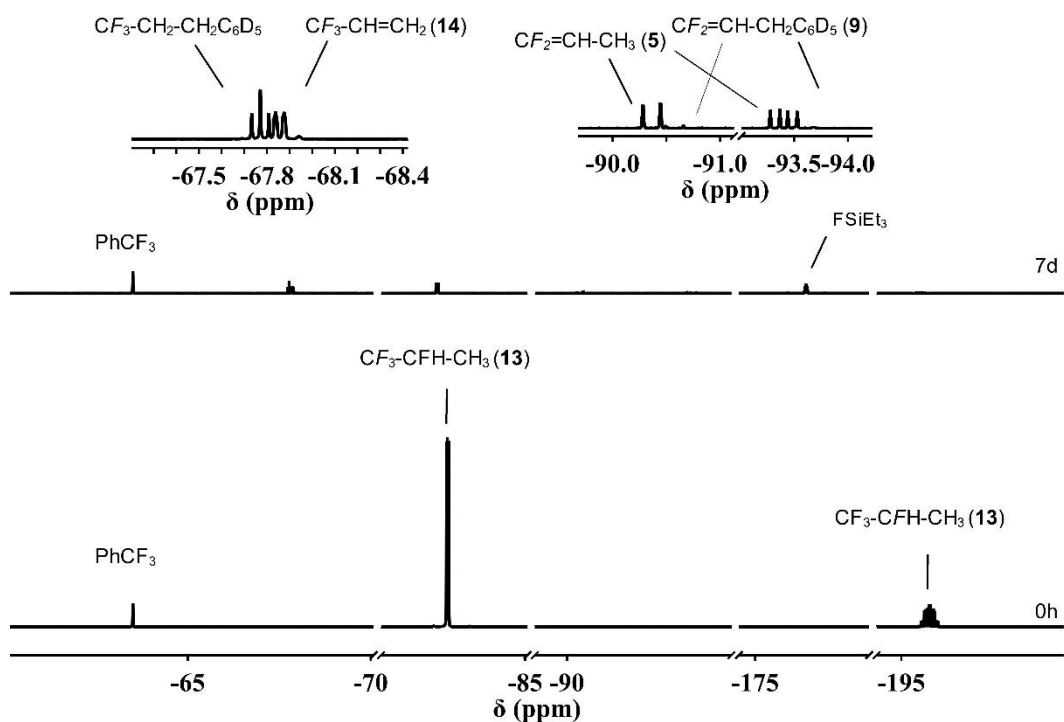

**Figure 16:**  $^{19}\text{F}$  NMR spectra for the activation of **13** in the presence of ACF as the catalyst and  $\text{HSiEt}_3$  as the hydrogen source in  $\text{C}_6\text{D}_6$ .

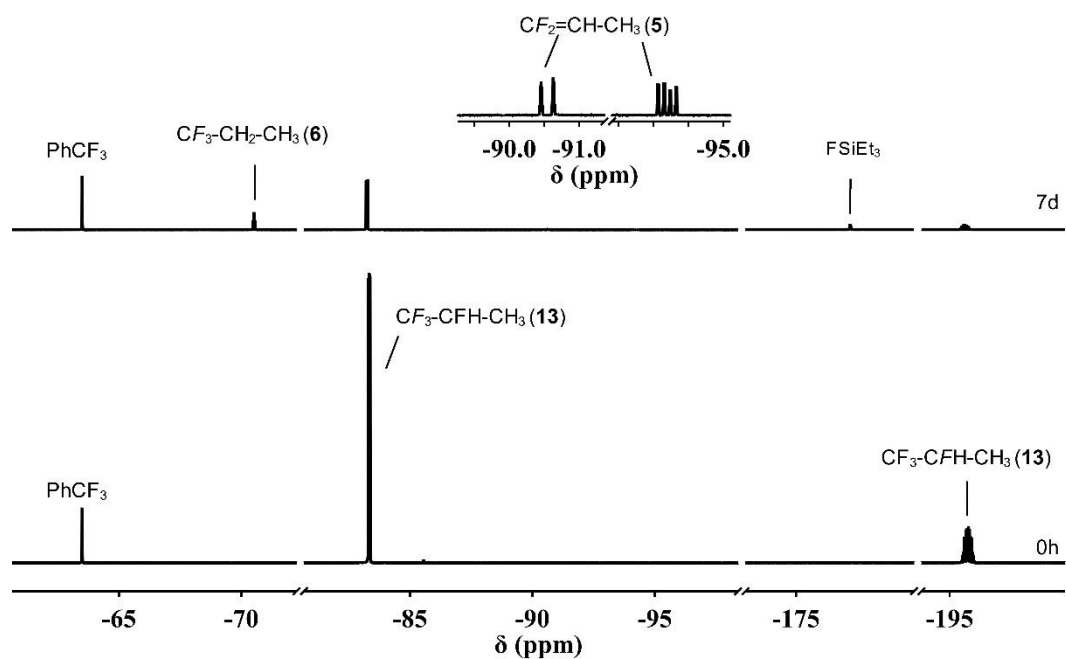

**Figure 17:**  $^{19}\text{F}$  NMR spectra for the activation of **13** in the presence of ACF as the catalyst and  $\text{HSiEt}_3$  as the hydrogen source (neat).

d. 1,1-difluoropropene **5**

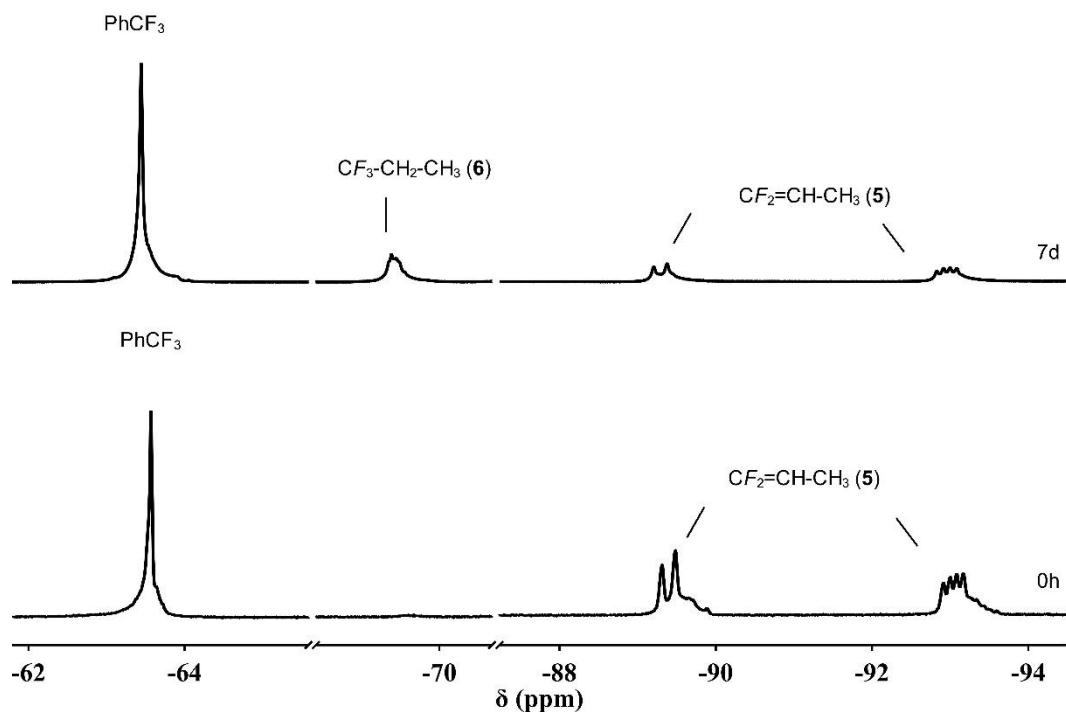

**Figure 18:**  $^{19}\text{F}$  NMR spectra for the activation of **5** in the presence of ACF as the catalyst and  $\text{HF}$  in  $\text{C}_6\text{D}_{12}$ .

e. 1,1,1-trifluoropropane **6**

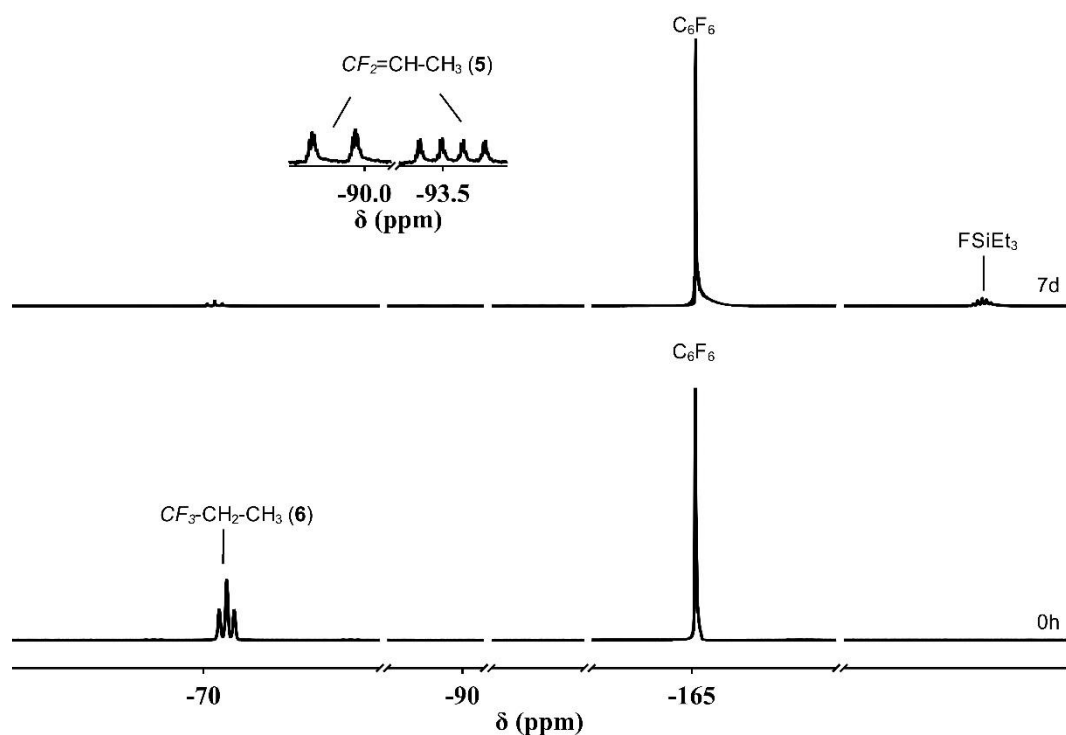

**Figure 19:**  $^{19}\text{F}$  NMR spectra for the activation of **6** in the presence of ACF as the catalyst and  $\text{HSiEt}_3$  as the hydrogen source in  $\text{C}_6\text{D}_{12}$ .

f. 3,3,3-trifluoropropene **14**

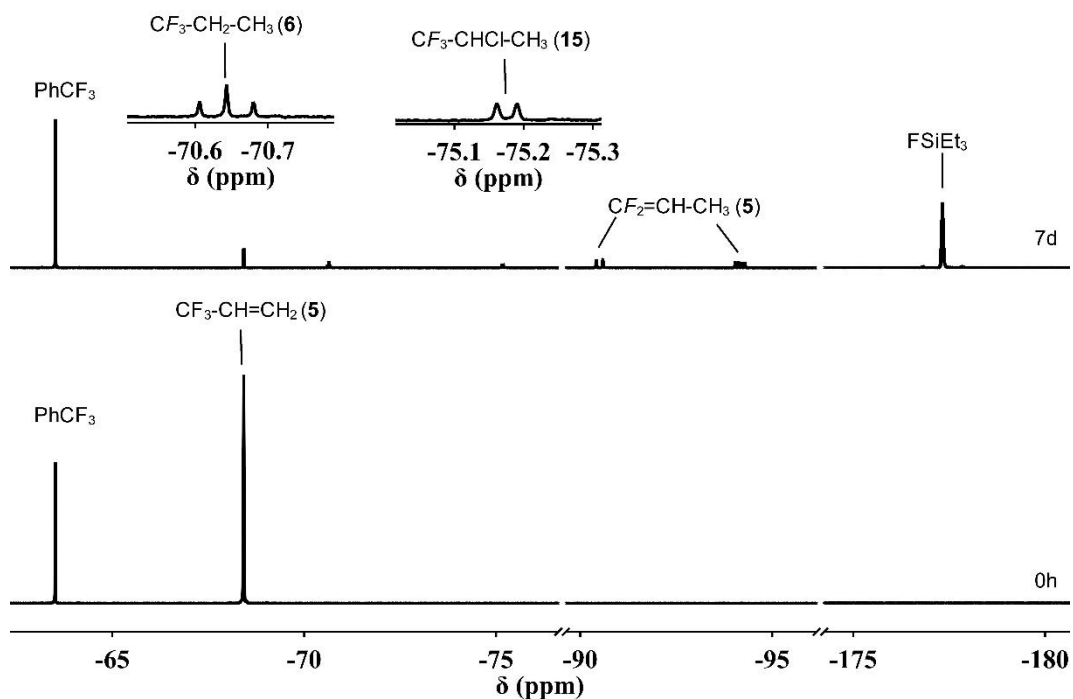

**Figure 20:**  $^{19}\text{F}$  NMR spectra for the activation of **14** in the presence of ACF as the catalyst and  $\text{HSiEt}_3$  as the hydrogen source in  $\text{C}_6\text{D}_{12}$ .

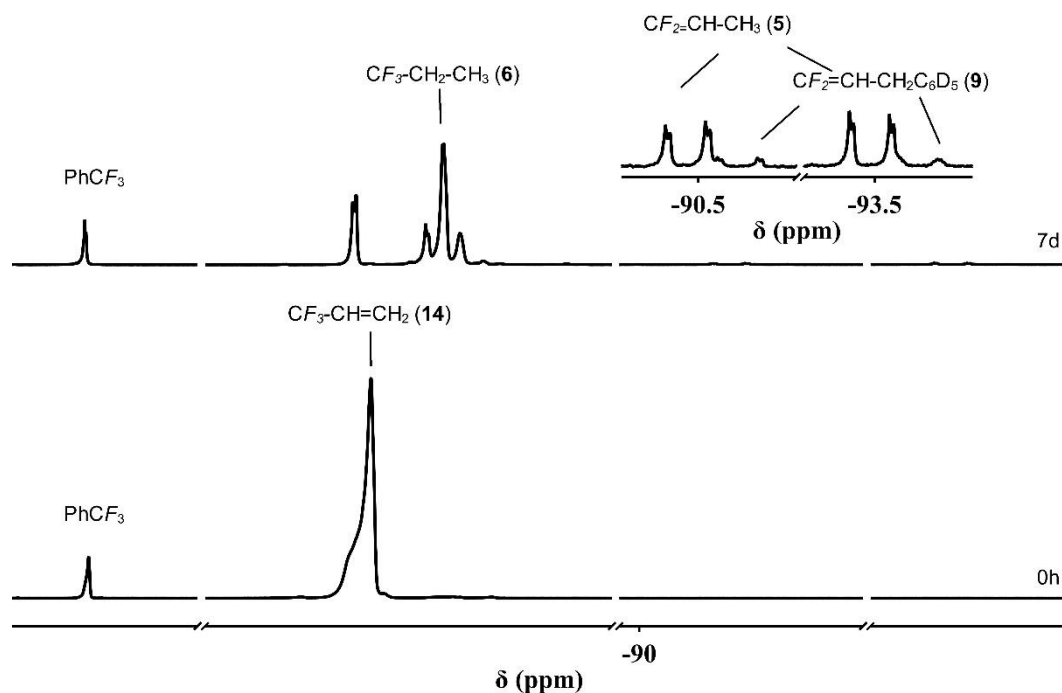

**Figure 21:**  $^{19}\text{F}$  NMR spectra for the activation of **14** in the presence of ACF as the catalyst and  $\text{HSiEt}_3$  as the hydrogen source in  $\text{C}_6\text{D}_6$ .

**Analytical data of  $\text{CF}_3\text{CF=CH}_2$  (1) [1]:**

$\delta$   $^1\text{H}$  NMR (300 MHz,  $\text{C}_6\text{D}_{12}$ ): 4.46 (dd,  $J = 13.2$  Hz,  $J = 4.9$  Hz, 1H,  $\text{CH}_2$ ), 4.32 (ddq,  $J = 14.8$  Hz,  $J = 4.9$  Hz,  $J = 1.6$  Hz, 1H,  $\text{CH}_2$ ) ppm

$\delta$   $^{19}\text{F}$  NMR (282 MHz,  $\text{C}_6\text{D}_{12}$ ): -74.4 (dd,  $J = 11$  Hz,  $J = 1.6$  Hz, 3F,  $\text{CF}_3$ ), -125.2 (ddq,  $J = 44$  Hz,  $J = 14.8$ ,  $J = 11$  Hz, 1F, CF) ppm

$\delta$   $^{19}\text{F}\{^1\text{H}\}$  NMR (282 MHz,  $\text{C}_6\text{D}_{12}$ ): -74.4 (d,  $J = 11$  Hz, 3F,  $\text{CF}_3$ ), -125.2 (q,  $J = 11$  Hz, 1F, CF) ppm

**Analytical data of  $\text{CF}_2\text{=CFCH}_3$  (2) [2]:**

$\delta$   $^1\text{H}$  NMR (300 MHz,  $\text{C}_6\text{D}_6$ ): 3.87 (dt,  $J = 17$  Hz,  $J = 4.2$  Hz, 3H,  $\text{CH}_3$ ) ppm

$\delta$   $^{19}\text{F}$  NMR (282 MHz,  $\text{C}_6\text{D}_6$ ): -107.4 (ddq,  $J = 91$  Hz,  $J = 32$  Hz,  $J = 4.2$  Hz, 1F,  $\text{CF}_2$ ), -127.2 (ddq,  $J = 114$  Hz,  $J = 91$  Hz,  $J = 4.2$  Hz, 1F,  $\text{CF}_2$ ), -168.2 (ddq,  $J = 114$  Hz,  $J = 32$  Hz,  $J = 17$  Hz, 1F, CF) ppm

**$\delta$   $^{19}\text{F}\{^1\text{H}\}$  NMR (282 MHz,  $\text{C}_6\text{D}_6$ ):** -107.4 (dd,  $J = 91$  Hz,  $J = 32$  Hz, 1F,  $\text{CF}_2$ ) , -127.2 (dd,  $J = 114$  Hz,  $J = 91$  Hz, 1F,  $\text{CF}_2$ ), -168.2 (dd,  $J = 114$  Hz,  $J = 32$  Hz, 1F, CF) ppm

**Analytical data of  $\text{CF}_2\text{CFCH}_2\text{C}_6\text{D}_5$  (3):**

**$\delta$   $^1\text{H}$  NMR (300 MHz,  $\text{C}_6\text{D}_6$ ):** 3.10 (ddd,  $J = 23$  Hz,  $J = 4$  Hz,  $J = 3$  Hz, 3H,  $\text{CH}_3$ ) ppm

**$\delta$   $^{19}\text{F}$  NMR (282 MHz,  $\text{C}_6\text{D}_6$ ):** -107 (ddt,  $J = 87$  Hz,  $J = 32$  Hz,  $J = 3$  Hz, 1F,  $\text{CF}_2$ ), -125.7 (ddt,  $J = 114.7$  Hz,  $J = 86.4$  Hz,  $J = 4.4$  Hz, 1F,  $\text{CF}_2$ ), -173 (ddt,  $J = 114.7$  Hz,  $J = 32$  Hz,  $J = 23$  Hz, 1F, CF) ppm

**$\delta$   $^{19}\text{F}\{^1\text{H}\}$  NMR (282 MHz,  $\text{C}_6\text{D}_6$ ):** -107 (dd,  $J = 87$  Hz,  $J = 32$  Hz, 1F,  $\text{CF}_2$ ), -125.7 (dd,  $J = 114.7$  Hz,  $J = 86.4$  Hz, 1F,  $\text{CF}_2$ ), -173 (ddt,  $J = 114.7$  Hz,  $J = 32$  Hz,  $J = 23$  Hz, 1F, CF) ppm

**Analytical data of  $\text{CF}_3\text{CH}=\text{CHF}$  (4a) [3]:**

**$\delta$   $^1\text{H}$  NMR (300 MHz,  $\text{C}_6\text{D}_{12}$ ):** 6.24 (ddq,  $J = 77$  Hz,  $J = 11$  Hz,  $J = 2$  Hz, 1H, CH), 4.88 (dq,  $J = 15$  Hz,  $J = 11$  Hz,  $J = 7$  Hz, 1H, CH) ppm

**$\delta$   $^{19}\text{F}$  NMR (282 MHz,  $\text{C}_6\text{D}_{12}$ ):** -62.3 (tt,  $J = 8$  Hz,  $J = 2$  Hz, 3F,  $\text{CF}_3$ ), -119.3 (dm,  $J = 77$ ,  $J = 8$  Hz, 1F, CF) ppm

**$\delta$   $^{19}\text{F}\{^1\text{H}\}$  NMR (282 MHz,  $\text{C}_6\text{D}_{12}$ ):** -61.5 (d,  $J = 8$  Hz, 3F,  $\text{CF}_3$ ), -119.3 (q,  $J = 8$  Hz, 1F, CF) ppm

**Analytical data of  $\text{CF}_3\text{CH}=\text{CHF}$  (4b) [3]:**

**$\delta$   $^1\text{H}$  NMR (300 MHz,  $\text{C}_6\text{D}_{12}$ ):** 5.42 (dd,  $J = 77$  Hz,  $J = 5$  Hz, 1H, CH), 4.26 (dq,  $J = 37$  Hz,  $J = 7.7$  Hz,  $J = 5$  Hz, 1H, CH) ppm

**$\delta$   $^{19}\text{F}$  NMR (282 MHz,  $\text{C}_6\text{D}_{12}$ ):** -58.7 (dd,  $J = 7$  Hz,  $J = 17$  Hz, 3F,  $\text{CF}_3$ ), -110 (dm,  $J = 77$ ,  $J = 17$  Hz, 1F, CF) ppm

**$\delta$   $^{19}\text{F}\{^1\text{H}\}$  NMR (282 MHz,  $\text{C}_6\text{D}_{12}$ ):** -58.7 (d,  $J = 17$  Hz, 3F,  $\text{CF}_3$ ), -110.3 (q,  $J = 17$ , 1F, CF) ppm

**Analytical data of  $\text{CF}_2\text{CHCH}_3$  (5):**

**$\delta$   $^1\text{H}$  NMR (300 MHz,  $\text{C}_6\text{D}_6$ ):** 4.00 (dq,  $J = 25$  Hz,  $J = 7$  Hz,  $J = 2$  Hz, 1H, CH), 1.48 (dt,  $J = 7$  Hz,  $J = 3$  Hz, 3H,  $\text{CH}_3$ ) ppm

**$\delta$   $^{19}\text{F}$  NMR (282 MHz,  $\text{C}_6\text{D}_6$ ):** -90.4 (m, 1F,  $\text{CF}_2$ ), -94.1 (ddq,  $J = 48$  Hz,  $J = 25$  Hz,  $J = 3$  Hz, 1F,  $\text{CF}_2$ ) ppm

$\delta$   $^{19}\text{F}\{^1\text{H}\}$  NMR (282 MHz,  $\text{C}_6\text{D}_6$ ): -90.4 (d,  $J = 48$  Hz, 1F,  $\text{CF}_2$ ), -94.1 (d,  $J = 48$  Hz, 1F,  $\text{CF}_2$ ) ppm

**Analytical data of  $\text{CF}_3\text{CH}_2\text{CH}_3$  (6):**

$\delta$   $^1\text{H}$  NMR (300 MHz,  $\text{C}_6\text{D}_6$ ): 1.95 (m, 2H,  $\text{CH}_2$ ), 1.06 (t,  $J = 8$  Hz, 3H,  $\text{CH}_3$ ) ppm

$\delta$   $^{19}\text{F}$  NMR (282 MHz,  $\text{C}_6\text{D}_6$ ): -70.5 (t,  $J = 10$  Hz, 3F,  $\text{CF}_3$ ) ppm

$\delta$   $^{19}\text{F}\{^1\text{H}\}$  NMR (282 MHz,  $\text{C}_6\text{D}_6$ ): -70.5 (s, 3F,  $\text{CF}_3$ ) ppm

**Analytical data of  $\text{CF}_2=\text{CHCH}_2\text{C}_6\text{D}_5$  (9):**

$\delta$   $^1\text{H}$  NMR (300 MHz,  $\text{C}_6\text{D}_6$ ): 3.99 (dtd,  $J = 22.4$  Hz,  $J = 8$  Hz,  $J = 2.1$  Hz, 1H, CH), 2.94 (dt,  $J = 22.4$  Hz,  $J = 8$  Hz, 2H,  $\text{CH}_2$ ) ppm

$\delta$   $^{19}\text{F}$  NMR (282 MHz,  $\text{C}_6\text{D}_6$ ): -90.3 (d,  $J = 46$  Hz, 1F,  $\text{CF}_2$ ), -93.1 - -93.7 (m, 1F,  $\text{CF}_2$ ) ppm

$\delta$   $^{19}\text{F}\{^1\text{H}\}$  NMR (282 MHz,  $\text{C}_6\text{D}_6$ ): -90.3 (d,  $J = 46$  Hz, 1F,  $\text{CF}_2$ ), -93.1 - -93.7 (d,  $J = 46$  Hz, 1F,  $\text{CF}_2$ ) ppm

**Analytical data of  $\text{CF}_3\text{CHFCH}_2\text{F}$  (10a):**

$\delta$   $^1\text{H}$  NMR (300 MHz,  $\text{C}_6\text{D}_6$ ): 4.84 (m, 1H, CHF), 4.66 (m, 1H,  $\text{CH}_2\text{F}$ ), 4.76 ppm (m, 1H,  $\text{CH}_2\text{F}$ ) ppm

$\delta$   $^{19}\text{F}$  NMR (282 MHz,  $\text{C}_6\text{D}_6$ ): -79.6 (q,  $J = 6$  Hz,  $J = 11$  Hz,  $J = 25$  Hz, 3F,  $\text{CF}_3$ ), -208.3 (m, 1F, CHF), -237.3 (m, 1F,  $\text{CH}_2\text{F}$ ) ppm

$\delta$   $^{19}\text{F}\{^1\text{H}\}$  NMR (282 MHz,  $\text{C}_6\text{D}_6$ ): -79.6 (q,  $J = 6$  Hz,  $J = 11$  Hz,  $J = 16$  Hz, 3F,  $\text{CF}_3$ ), -208.3 (qt,  $J = 6$  Hz,  $J = 11$  Hz,  $J = 16$  Hz, 1F, CHF), -237.3 (m, 1F,  $\text{CH}_2\text{F}$ ) ppm

**Analytical data of  $\text{CF}_3\text{CF}_2\text{CH}_3$  (10b):**

$\delta$   $^1\text{H}$  NMR (300 MHz,  $\text{C}_6\text{D}_6$ ): 1.70 (tt,  $J = 1.2$  Hz,  $J = 18$  Hz, 3H,  $\text{CH}_3$ ), ppm

$\delta$   $^{19}\text{F}$  NMR (282 MHz,  $\text{C}_6\text{D}_6$ ): -88.3 (s, 3F,  $\text{CF}_3$ ), -112.8 (q,  $J = 18$  Hz, 2F,  $\text{CF}_2$ ) ppm

$\delta$   $^{19}\text{F}\{^1\text{H}\}$  NMR (282 MHz,  $\text{C}_6\text{D}_6$ ): -88.3 (s, 3F,  $\text{CF}_3$ ), -112.8 (s,  $J = 18$  Hz, 2F,  $\text{CF}_2$ ) ppm

**Analytical data of  $\text{CF}_3\text{CH}_2\text{CHF}_2$  (10c):**

$\delta$   $^1\text{H}$  NMR (300 MHz,  $\text{C}_6\text{D}_6$ ): 2.66 (m,  $J = 4.7$  Hz, 3H,  $\text{CH}_2$ ), 5.97 (tt,  $J = 4.7$  Hz,  $J = 54$  Hz, 1H,  $\text{CHF}_2$ ) ppm

**$\delta$   $^{19}\text{F}$  NMR (282 MHz,  $\text{C}_6\text{D}_6$ ):** -63.1 (tm,  $J = 8$  Hz, 3F,  $\text{CF}_3$ ), -116 (dm,  $J = 8$  Hz,  $J = 57$  Hz, 2F,  $\text{CHF}_2$ ) ppm

**$\delta$   $^{19}\text{F}\{^1\text{H}\}$  NMR (282 MHz,  $\text{C}_6\text{D}_6$ ):** -63.1 (t,  $J = 8$  Hz, 3F,  $\text{CF}_3$ ), -116 (m,  $J = 8$  Hz, 2F,  $\text{CHF}_2$ ) ppm

**Analytical data of  $\text{CF}_3\text{CHFCH}_2\text{C}_6\text{D}_5$  (11):**

**$\delta$   $^1\text{H}$  NMR (300 MHz,  $\text{C}_6\text{D}_6$ ):** 2.25 (d,  $J = 6$  Hz, 2H,  $\text{CH}_2$ ), 3.94 (t,  $J = 6$  Hz, 1H, CH) ppm

**$\delta$   $^{19}\text{F}$  NMR (282 MHz,  $\text{C}_6\text{D}_6$ ):** -79.4 (dd,  $J = 6$  Hz,  $J = 11$  Hz, 3F,  $\text{CF}_3$ ), -202 (m,  $J = 18$ , 1F, CF) ppm

**$\delta$   $^{19}\text{F}\{^1\text{H}\}$  NMR (282 MHz,  $\text{C}_6\text{D}_6$ ):** -79.4 (d,  $J = 11$ , 3F,  $\text{CF}_3$ ), -202 (q,  $J = 11$ , 1F, CF) ppm

**Analytical data of  $\text{CF}_3\text{CDFCH}_2\text{C}_6\text{D}_5$  (12):**

**$\delta$   $^1\text{H}$  NMR (300 MHz,  $\text{C}_6\text{D}_6$ ):** 2.28 (d,  $J = 6$  Hz, 2H,  $\text{CH}_2$ ), ppm

**$\delta$   $^{19}\text{F}$  NMR (282 MHz,  $\text{C}_6\text{D}_6$ ):** -80.7 (dd,  $J = 6$  Hz,  $J = 11$  Hz, 3F,  $\text{CF}_3$ ), -200 (m,  $J = 18$ , 1F, CF) ppm

**$\delta$   $^{19}\text{F}\{^1\text{H}\}$  NMR (282 MHz,  $\text{C}_6\text{D}_6$ ):** -80.7 (d,  $J = 11$ , 3F,  $\text{CF}_3$ ), -200 (q,  $J = 11$ , 1F, CF) ppm

**Analytical data of  $\text{CF}_3\text{CHFCH}_3$  (13):**

**$\delta$   $^1\text{H}$  NMR (300 MHz,  $\text{C}_6\text{D}_6$ ):** 1.5 (dd,  $J = 25$  Hz,  $J = 6$  Hz, 3H,  $\text{CH}_3$ ), 4.8 (dm,  $J = 46$  Hz,  $J = 6$  Hz, 1H, CH) ppm

**$\delta$   $^{19}\text{F}$  NMR (282 MHz,  $\text{C}_6\text{D}_6$ ):** -83.5 (dd,  $J = 11$  Hz,  $J = 6$  Hz, 3F,  $\text{CF}_3$ ), -195.8 (m,  $J = 10$  Hz, 1F, CF) ppm

**$\delta$   $^{19}\text{F}\{^1\text{H}\}$  NMR (282 MHz,  $\text{C}_6\text{D}_6$ ):** -82.3 (d,  $J = 11$  Hz, 3F,  $\text{CF}_3$ ), -194.5 (q,  $J = 10$  Hz, 1F, CF) ppm

**Analytical data of  $\text{CF}_3\text{CH}=\text{CH}_2$  (14):**

**$\delta$   $^1\text{H}$  NMR (300 MHz,  $\text{C}_6\text{D}_6$ ):** 5.39-5.33 (m, 2H,  $\text{CH}_2$ ), 4.88 - 4.75 (m, 1H, CH) ppm

**$\delta$   $^{19}\text{F}$  NMR (282 MHz,  $\text{C}_6\text{D}_6$ ):** -67.4 (d,  $J = 4$  Hz, 3F,  $\text{CF}_3$ ) ppm

**$\delta$   $^{19}\text{F}\{^1\text{H}\}$  NMR (282 MHz,  $\text{C}_6\text{D}_6$ ):** -67.4 (s, 3F,  $\text{CF}_3$ ) ppm



**Analytical data of CF<sub>3</sub>CHClCH<sub>3</sub> (15) [4]:**

$\delta$  <sup>1</sup>H NMR (300 MHz, C<sub>6</sub>D<sub>6</sub>): 4.04 (q, *J* = 6 Hz, 1H, CH), 1.37 (d, *J* = 6 Hz, 3H, CH<sub>3</sub>) ppm

$\delta$  <sup>19</sup>F NMR (282 MHz, C<sub>6</sub>D<sub>6</sub>): -74.2 (d, *J* = 10 Hz, 3F, CF<sub>3</sub>) ppm

$\delta$  <sup>19</sup>F{<sup>1</sup>H} NMR (282 MHz, C<sub>6</sub>D<sub>6</sub>): -74.2 (s, 3F, CF<sub>3</sub>) ppm

References:

- (1) Stepanov, I. V.; Burmakov, A. I.; Kunshenko, B. V.; Alekseeva, L. A.; Yagupol'skii, L. *M. Zh. Org. Khim* **1983**, 19, 273–279
- (2) Meißner, G.; Kretschmar, K.; Braun, T.; Kemnitz, E. *Angew. Chem. Int. Ed.* **2017**, 56 (51), 16338–16341. doi:10.1002/anie.201707759
- (3) Kühnel, M. F.; Lentz, D. *Angew. Chemie - Int. Ed.* **2010**, 49 (16), 2933–2936. doi:10.1002/anie.200907162
- (4) Hanack, M.; Ullmann, J. *J. Org. Chem.* **1989**, 54 (6), 1432–1435. doi:10.1021/jo00267a036
